# Supplementary material for: College Course About Flourishing and Students’ Mental Health During SARS-CoV-2
Source: PubMed Central journal article supplement (PMC11561689; doi:10.1001/jamanetworkopen.2024.44845), 2024-11-13
Supplement: jamanetwopen-e2444845-s002.pdf [file jamanetwopen-e2444845-s002.pdf]

## Data Sharing Statement

Hirshberg. College Course About Flourishing and Students' Mental Health During SARS-CoV-2. *JAMA Netw Open*. Published November 13, 2024.

doi:10.1001/jamanetworkopen.2024.44845

### Data

**Data available:** No

### Additional Information

**Explanation for why data not available:** Due to complications arising from multiple IRBs, data from this study cannot be made publicly available.
